# Supplementary material
Source: PubMed Central journal article supplement (PMC4721088)
Supplement: rspb20152220supp1.pdf [file rspb20152220supp1.pdf]

**SUPPORTING ONLINE MATERIAL ACCOMPANYING THE MANUSCRIPT:**

**“Time in tortoiseshell: a bomb radiocarbon-validated chronology in sea turtle scutes”**

By K. S. Van Houtan, A. H. Andrews, T. T. Jones, S. K. K. Murakawa, and M. E. Hagemann.

*Contained in this document are two figures, three tables, and R code for the MLE routine.*

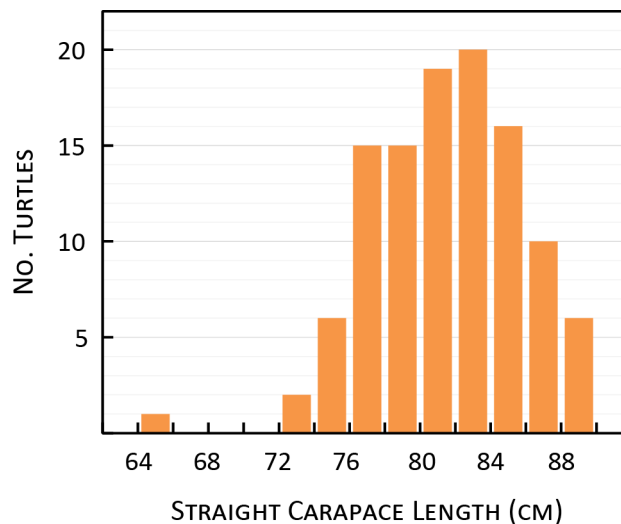

**Figure S1, Estimation of the VBGF parameter  $L_{oo}$  from empirical population monitoring of nesting female hawksbill sea turtles.** Beach monitoring from 1991-2014 documented the measured straight carapace lengths (SCL) of  $n = 110$  nesting females from Hawaii ( $n = 99$ ) and Maui islands ( $n = 11$ ). Orange bars accumulate the observations in each 2 cm bin, representing the average measured length (measurements were repeated at each nesting attempt) during the first observed year. The median SCL from of all observed nesting females was 81.0 cm (range 65.0 - 89.0 cm). As turtle growth after breeding maturity is negligible (Frazer & Ehrhart 1980, Price *et al.* 2004, Jones *et al.* 2011), our metric encompasses the full range of the sizes of mature breeding female sizes. Further details on the monitoring programs are provided elsewhere (Seitz *et al.* 2012, Van Houtan *et al.* 2012). For sea turtles,  $L_{oo}$  does not represent unattainable growth, but the median breeding size.

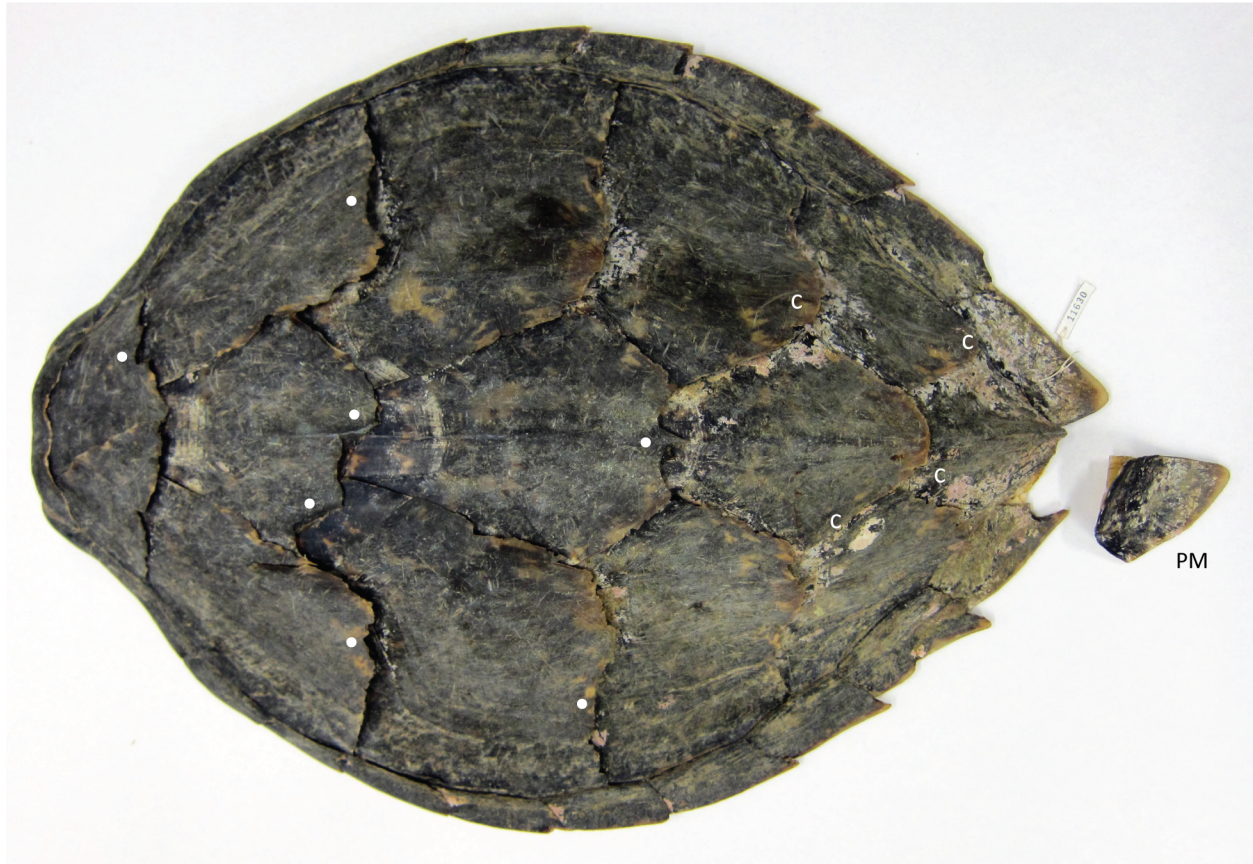

**Figure S2, Dorsal view of a preserved, archived hawksbill carapace with posterior marginal scute removed.** Juvenile male hawksbill measuring 45 cm SCL from Makaha, Oahu Island, Hawaii, in January 1990. The turtle was collected by NOAA as part of the regular strandings response program after it was found dead and entangled in a fishing net. Posterior marginal scute (PM) can often be easily removed from a dry preserved carapace manually, without requiring a saw that may damage adjoining bone or scutes. “c” denotes crustose coralline algae growing on the surface of posterior carapace portion, typically in the lee of scute imbrication. Notice the cracks, chips, and other damage to the vertebral and costal scutes – especially toward the anterior. Unlike other sea turtle species, hawksbills have imbricated scutes meaning more anterior scutes overlap immediately adjoining scutes to the posterior. It is at these imbrications or overlaps where scute damage is most frequent, denoted by white filled circles. Notice how the marginal scute edges to the (left) anterior section are smooth from wear, but towards the (right) posterior those same margins are pointed as they are in the lee and protected during forward motion. Posterior marginal scutes, by their position and due to their thickness (both in contrast to more anterior carapace scutes) are not as easily damaged and therefore have the greatest potential to retain a complete chronological tissue record.

| TURTLE<br>ACCESSION ID | SCL<br>(cm) | SEX  | COLLECT<br>INSTITUTION | COLLECT<br>YEAR | COLLECT<br>REGION | COLLECT<br>LOCATION | TURTLE<br>TREATMENT | GROWTH<br>LINES |
|------------------------|-------------|------|------------------------|-----------------|-------------------|---------------------|---------------------|-----------------|
| Ei11222011Hi04.1       | 4.1         | Unk. | PIFSC                  | 2011            | C. N. Pacific     | Hawaii              | wild                | 3               |
| Ei10202011Hi04.3       | 4.3         | Unk. | PIFSC                  | 2011            | C. N. Pacific     | Hawaii              | wild                | 3               |
| Ei09072011Hi4.3        | 4.3         | Unk. | PIFSC                  | 2011            | C. N. Pacific     | Hawaii              | wild                | 3               |
| Ei09072011hi4.56       | 4.6         | Unk. | PIFSC                  | 2011            | C. N. Pacific     | Hawaii              | wild                | 3               |
| Ei09072011Hi4.59       | 4.6         | Unk. | PIFSC                  | 2011            | C. N. Pacific     | Hawaii              | wild                | 4               |
| Ei?????FW14.5          | 14.5        | Unk. | USFWS                  | Unk.            | Pacific           | Indonesia           | wild                | 15              |
| Ei08201996iN21         | 21.4        | Unk. | USFWS                  | 1996            | W. Pacific        | Indonesia           | wild                | 14              |
| Ei11152011FW31         | 31.0        | Unk. | USFWS                  | 2011            | W. Pacific        | Indonesia           | wild                | 29              |
| Ei04012012Oz38.8       | 38.8        | Unk. | USFWS                  | 2012            | S. Pacific        | Australia           | wild                | 46              |
| Ei09101962iN39.2       | 39.2        | Unk. | USFWS                  | 1962            | W. Pacific        | Indonesia           | wild                | 41              |
| Ei06172011Hi39.2       | 39.2        | Unk. | PIFSC                  | 2011            | C. N. Pacific     | Hawaii              | wild                | 75              |
| Ei08172011Hi39.9       | 39.9        | F    | PIFSC                  | 2011            | C. N. Pacific     | Hawaii              | wild                | 47              |
| Ei02272013To40.4       | 40.4        | Unk. | USFWS                  | 2013            | S. Pacific        | Tonga               | wild                | 51              |
| Ei05222011Hi41         | 41.4        | F    | PIFSC                  | 2011            | C. N. Pacific     | Hawaii              | wild                | 60              |
| Ei10291992Kw42.6       | 42.6        | M    | PIFSC                  | 1992            | W. Pacific        | Kwajelin            | wild                | 42              |
| Ei02272013To42.7       | 42.7        | Unk. | USFWS                  | 2013            | S. Pacific        | Tonga               | wild                | 48              |
| Ei04022012Hi44.2       | 44.2        | F    | PIFSC                  | 2012            | C. N. Pacific     | Hawaii              | wild                | 50              |
| Ei05301997Hi44         | 44.4        | F    | PIFSC                  | 1997            | C. N. Pacific     | Hawaii              | wild                | 65              |
| Ei01301990Hi44.5       | 44.5        | M    | BPBM                   | 1990            | C. N. Pacific     | Hawaii              | wild                | 42              |
| Ei11152011Pa44         | 44.6        | Unk. | USFWS                  | 2011            | W. Pacific        | Palau               | wild                | 52              |
| Ei11291977Hi44.6       | 44.6        | Unk. | USFWS                  | 1977            | C. N. Pacific     | Hawaii              | wild                | 52              |
| Ei?????FW48.8          | 48.8        | Unk. | USFWS                  | Unk.            | Pacific           | Unk.                | wild                | 43              |
| Ei10211992Kw50.3       | 50.3        | F    | PIFSC                  | 1992            | W. Pacific        | Kwajelin            | wild                | 64              |
| Ei????1970Hi52.3       | 52.3        | Unk. | PIFSC                  | 1970            | C. N. Pacific     | Hawaii              | captive             | 76              |
| Ei04112013Hi54.5       | 54.5        | F    | PIFSC                  | 2013            | C. N. Pacific     | Hawaii              | wild                | 124             |
| Ei04232010Hi57         | 57.5        | F    | PIFSC                  | 2010            | C. N. Pacific     | Hawaii              | wild                | 90              |
| Ei11042011Hi61         | 61.1        | F    | PIFSC                  | 2011            | C. N. Pacific     | Hawaii              | wild                | 78              |
| Ei12211976BP72         | 72.0        | Unk. | BPBM                   | 1976            | C. N. Pacific     | Hawaii              | wild                | 173             |
| Ei11241978Hi75.2       | 75.2        | Unk. | PIFSC                  | 1978            | C. N. Pacific     | Hawaii              | captive             | 104             |
| Ei05151979Hi76.4       | 76.4        | M    | PIFSC                  | 1979            | C. N. Pacific     | Hawaii              | captive             | 123             |
| Ei04061987Hi77.8       | 77.8        | M    | BPBM                   | 1987            | C. N. Pacific     | Hawaii              | wild                | 122             |
| Ei11132006FW78         | 78.4        | Unk. | USFWS                  | 2006            | Pacific           | Unk.                | wild                | 110             |
| Ei05031994FW79         | 79.2        | Unk. | USFWS                  | 1994            | Pacific           | Unk.                | wild                | 124             |
| Ei09032008Hi82         | 82.5        | F    | PIFSC                  | 2008            | C. N. Pacific     | Hawaii              | wild                | 197             |
| Ei????1966BP82         | 82.7        | Unk. | BPBM                   | 1962            | C. N. Pacific     | Hawaii              | wild                | 141             |
| Ei09112007Hi83         | 83.0        | F    | PIFSC                  | 2007            | C. N. Pacific     | Hawaii              | wild                | --              |
| Ei04041988Hi83         | 83.2        | F    | BPBM                   | 1988            | C. N. Pacific     | Hawaii              | wild                | 184             |
| Ei08191996Hi88.7       | 88.7        | F    | BPBM                   | 1996            | C. N. Pacific     | Hawaii              | wild                | --              |

**Table S1, Raw metadata for all hawksbill carapaces used in this study.** For origin institutions, “PIFSC” is the NOAA Pacific Islands Fisheries Science Center, “USFWS” is the U.S. Fish & Wildlife Service, and “BPBM” is the Bernice Pauahi Bishop Museum. “Collect year” is the year of death. Only turtles from the Hawaii population were used in the age determination portion of the study, but all turtles appear in Figure 1c, the basic plot of length to number of apparent scute growth lines. As stipulated in the Methods, we collected and archived all specimens as specified under the U.S. Endangered Species Act (USFWS permit no. TE-72088A-0).

| SAMPLE ID          | FORM.  | Fm     | $\Delta^{14}\text{C}$ | FORM. | $\Delta^{14}\text{C}$ | $\Delta^{14}\text{C}$ |
|--------------------|--------|--------|-----------------------|-------|-----------------------|-----------------------|
|                    | MODERN | ERR    | raw                   | YEAR  | CALIB.                | ADJUST.               |
| Ei----1962BP82-D   | 0.9151 | 0.004  | -86.72                | 1942  | -86.67                | -84.01                |
| Ei----1962BP82-E   | 0.9358 | 0.003  | -66.01                | 1945  | -66.01                | -63.63                |
| Ei----1962BP82-F   | 0.9458 | 0.0026 | -56.00                | 1947  | -56.03                | -53.86                |
| Ei----1962BP82-C   | 0.9466 | 0.0031 | -55.24                | 1956  | -55.23                | -54.09                |
| Ei----1962BP82-B   | 0.9652 | 0.0036 | -36.70                | 1960  | -36.67                | -35.97                |
| Ei----1962BP82-A   | 0.9681 | 0.0031 | -33.73                | 1963  | -33.77                | -33.36                |
| Ei04061987Hi77.8-F | 1.0342 | 0.0033 | 31.05                 | 1969  | 29.58                 | 31.86                 |
| Ei04061987Hi77.8-H | 1.085  | 0.0025 | 80.19                 | 1971  | 80.15                 | 82.25                 |
| Ei04061987Hi77.8-E | 1.0877 | 0.0033 | 84.46                 | 1974  | 82.84                 | 84.61                 |
| Ei04061987Hi77.8-D | 1.0733 | 0.0039 | 70.10                 | 1975  | 68.51                 | 70.12                 |
| Ei04061987Hi77.8-C | 1.0909 | 0.0027 | 87.65                 | 1977  | 86.03                 | 87.34                 |
| Ei04061987Hi77.8-G | 1.0725 | 0.0034 | 69.26                 | 1979  | 67.71                 | 68.77                 |
| Ei04061987Hi77.8-B | 1.0728 | 0.0032 | 69.55                 | 1982  | 68.01                 | 68.62                 |
| Ei04061987Hi77.8-A | 1.0317 | 0.0035 | 28.61                 | 1987  | 27.09                 | 27.06                 |
| Ei12211976Hi72-E   | 0.9313 | 0.0024 | -71.67                | 1955  | -71.62                | -69.23                |
| Ei12211976Hi72-F   | 0.9548 | 0.0024 | -48.17                | 1959  | -48.20                | -46.24                |
| Ei12211976Hi72-D   | 0.9508 | 0.0024 | -52.16                | 1961  | -52.19                | -50.46                |
| Ei12211976Hi72-G   | 0.9841 | 0.0025 | -19.01                | 1964  | -18.99                | -17.51                |
| Ei12211976Hi72-C   | 1.0694 | 0.0025 | 66.02                 | 1969  | 66.04                 | 66.95                 |
| Ei12211976Hi72-B   | 1.074  | 0.0027 | 70.58                 | 1970  | 70.63                 | 71.40                 |
| Ei12211976Hi72-H   | 1.1053 | 0.0029 | 101.86                | 1972  | 101.83                | 102.36                |
| Ei12211976Hi72-A   | 1.1043 | 0.0032 | 100.84                | 1974  | 100.83                | 101.10                |
| Ei04041988Hi83-H   | 0.9683 | 0.003  | -36.14                | 1962  | -36.14                | -33.15                |
| Ei04041988Hi83-I   | 0.9895 | 0.003  | -15.09                | 1965  | -15.04                | -12.23                |
| Ei04041988Hi83-J   | 0.9928 | 0.0027 | -11.80                | 1965  | -11.75                | -9.00                 |
| Ei04041988Hi83-G   | 1.0401 | 0.0032 | 35.38                 | 1968  | 35.33                 | 37.84                 |
| Ei04041988Hi83-K   | 1.0511 | 0.0022 | 46.24                 | 1969  | 46.28                 | 48.69                 |
| Ei04041988Hi83-F   | 1.0689 | 0.0027 | 63.98                 | 1971  | 64.00                 | 66.19                 |
| Ei04041988Hi83-L   | 1.0774 | 0.0026 | 72.45                 | 1973  | 72.46                 | 74.41                 |
| Ei04041988Hi83-E   | 1.108  | 0.0036 | 102.92                | 1976  | 102.92                | 104.52                |
| Ei04041988Hi83-D   | 1.0703 | 0.0028 | 65.36                 | 1980  | 65.39                 | 66.42                 |
| Ei04041988Hi83-B   | 1.0862 | 0.0035 | 81.23                 | 1984  | 81.22                 | 81.74                 |
| Ei04041988Hi83-A   | 1.0566 | 0.0044 | 51.77                 | 1988  | 51.75                 | 51.72                 |
| Ei05022011Hi41.4-B | 1.0519 | 0.0031 | 44.17                 | 2005  | 44.17                 | 44.94                 |
| Ei05022011Hi41.4-A | 1.0587 | 0.0035 | 50.87                 | 2011  | 50.92                 | 50.87                 |
| Ei05301997Hi44.4-B | 1.045  | 0.0035 | 39.09                 | 1991  | 39.08                 | 39.77                 |
| Ei05301997Hi44.4-A | 1.0625 | 0.0038 | 56.52                 | 1997  | 56.48                 | 56.42                 |
| Ei04022012Hi44.2-B | 1.0576 | 0.003  | 49.69                 | 2005  | 49.70                 | 50.60                 |
| Ei04022012Hi44.2-A | 1.0536 | 0.0032 | 45.73                 | 2012  | 45.73                 | 45.69                 |
| Ei04232010Hi57.5-B | 1.0656 | 0.003  | 57.90                 | 2001  | 57.89                 | 59.10                 |
| Ei04232010Hi57.5-A | 1.0317 | 0.0031 | 24.19                 | 2010  | 24.24                 | 24.20                 |
| Ei11042011Hi61.1-B | 1.0918 | 0.0036 | 83.80                 | 1998  | 83.77                 | 85.45                 |
| Ei11042011Hi61.1-A | 1.0463 | 0.0033 | 38.63                 | 2011  | 38.61                 | 38.57                 |
| Ei09032008Hi82.5-D | 1.0752 | 0.0033 | 67.69                 | 1976  | 67.68                 | 71.77                 |
| Ei09032008Hi82.5-C | 1.095  | 0.0033 | 87.30                 | 1982  | 87.34                 | 90.77                 |
| Ei09032008Hi82.5-B | 1.0735 | 0.0031 | 65.95                 | 1986  | 65.99                 | 68.84                 |
| Ei09032008Hi82.5-A | 1.0689 | 0.0035 | 61.47                 | 2009  | 61.43                 | 61.34                 |
| Ei11291974Hi44.6-B | 1.1151 | 0.0034 | 111.92                | 1971  | 111.87                | 112.25                |
| Ei11291974Hi44.6-C | 1.115  | 0.0025 | 111.74                | 1973  | 111.77                | 111.90                |
| Ei11291974Hi44.6-A | 1.0856 | 0.0037 | 82.43                 | 1975  | 82.45                 | 82.34                 |
| Ei01301990Hi44.5-B | 1.12   | 0.0034 | 114.64                | 1984  | 114.59                | 115.42                |
| Ei01301990Hi44.5-A | 1.0822 | 0.0054 | 76.98                 | 1990  | 76.98                 | 76.97                 |
| Ei08191996Hi88.7-A | 1.0419 | 0.0029 | 36.14                 | 1997  | 36.12                 | 36.04                 |
| Ei09112007Hi83-A   | 1.0431 | 0.0052 | 35.92                 | 2008  | 35.93                 | 35.85                 |

**Table S2, Radiocarbon results from the National Ocean Sciences Accelerator Mass Spectrometry (NOSAMS) facility at the Woods Hole Oceanographic Institution.** Sample ID is the same as in Table S1, with the ultimate addition of a letter code for the microsample transect. See main text Methods for descriptions of the column headings Formation Modern, its error,  $\Delta^{14}\text{C}$  values, adjustments and calibrations. Formation year is listed for the median growth ageing scenario (i.e. displayed in the main text Figure 4, Figure 5c).

| TURTLE<br>ID     | COLLECT<br>DATE | HATCH YEAR DATE RANGE |                       |           | AGE  |      |      |
|------------------|-----------------|-----------------------|-----------------------|-----------|------|------|------|
|                  |                 | VBGF                  | $\Delta^{14}\text{C}$ | OVERLAP   | MIN  | MED  | MAX  |
| hatchlings       | n/a             | n/a                   | n/a                   | n/a       | 0.0  | 0.0  | 0.0  |
| Ei02112015Hi9.2  | 2015            | n/a                   | n/a                   | n/a       | 0.1  | 0.3  | 0.6  |
| Ei----1966BP82   | 1966            | 1882-1943             | 1944-1952             | 1936-1942 | 24.0 | 27.0 | 30.0 |
| Ei04061987Hi77.8 | 1987            | 1947-1976             | 1966-1971, 1983-2012  | 1966-1971 | 16.0 | 18.6 | 21.1 |
| Ei12211976Hi72   | 1977            | 1949-1969             | 1930-1958             | 1949-1958 | 19.0 | 23.5 | 28.0 |
| Ei04041988Hi83   | 1988            | 1904-1965             | 1958-1964             | 1958-1964 | 24.3 | 27.3 | 30.3 |
| Ei05022011Hi41.4 | 2011            | 2002-2009             | 1966-2012             | 2002-2009 | 2.4  | 5.9  | 9.4  |
| Ei05301997Hi44.4 | 1997            | 1987-1994             | 1966-1974, 1980-2012  | 1987-1994 | 3.4  | 6.9  | 10.4 |
| Ei04022012Hi44.2 | 2012            | 2002-2009             | 1966-2012             | 2002-2009 | 3.3  | 6.8  | 10.3 |
| Ei04232010Hi57.5 | 2010            | 1995-2006             | 1967-2009             | 1995-2006 | 4.3  | 9.8  | 15.3 |
| Ei11042011Hi61.1 | 2011            | 1993-2006             | 1967-2001             | 1993-2001 | 10.3 | 14.3 | 18.3 |
| Ei09032008Hi82.5 | 2009            | 1925-1986             | 1967-2005             | 1967-1986 | 22.7 | 32.2 | 41.7 |
| Ei11291974Hi44.6 | 1975            | 1965-1972             | 1970-1992             | 1970-1972 | 2.5  | 3.7  | 4.9  |
| Ei01301990Hi45.9 | 1990            | 1979-1987             | 1970-1992             | 1979-1987 | 2.9  | 7.0  | 11.1 |

**Table S3, Age determination metadata for the Hawaii hawksbills analyzed in this study.** See main text Methods for more detailed descriptions of the three age scenarios of slow (min), mean (med), and fast (max) growth. “VBGF” represents the date range from the constraints on  $k$  for the von Bertalanffy growth model, “ $\Delta^{14}\text{C}$ ” is the estimated date range from the reported radiocarbon values for that tissue sample, and “Overlap” is where the series coincide. The data in the three columns on the right are used for the MLE procedure to fit the VBGF models, to estimate the growth somatic parameter  $k$ , shown in in the main text Figure 5.

## Complete R code for the MLE estimation of the VBGF model fit to age data

```
### R CODE BEGINS HERE
### SUPPORTING ONLINE MATERIAL, R CODE, AND NOTES FOR THE FOLLOWING STUDY
### TIME IN TORTOISESHELL: A BOMB RADIOCARBON VALIDATED CHRONOLOGY...
### Generated by Kyle S. Van Houtan (kyle.vanhoutan@gmail.com, +1 808 228 1112)
### At the time with NOAA Fisheries, based in Honolulu, Hawaii, in June 2015
### Purpose is to fit growth models to length-age data for hawksbill sea turtles using R
### Uses empirical data for t0 and Loo, and use MLE to optimize for growth parameter k
### Do this by first generating the negative log-likelihood function, then call models within

### Read in the data from csv files
### create vectors from lengths and ages within
captive.data <- read.csv("captive_ages.csv",header=T)
wild.data <- read.csv("d14c_ages.csv",header=T)
captive.ages <- captive.data$AgeCap
captive.lengths <- captive.data$Length
wild.ages.min <- wild.data$AgeMin
wild.ages.med <- wild.data$AgeMed
wild.ages.max <- wild.data$AgeMax
wild.lengths <- wild.data$Length
n.captive <- length(captive.lengths)
n.wild <- length(wild.lengths)
Linf <- 81.0
t0 <- (62.5/365.25)

### FIRST RUN VBGF FOR CAPTIVE-REARED HAWKSBILL DATA
### VBGF formula in general terms is  $L_t <- L_{inf}(1 - \exp(-k(t-t_0)))$ 
### get negative log-likelihood first for VBGF
### generate predicted lengths vector from VBGF
NLL.captive <- function(Linf, k, sigma, t0, captive.ages, captive.lengths, n.captive) {
  pred.Lt.cap <- Linf*(1-exp(-k*(captive.ages-t0)))
  NLL.captive <- n.captive*log(sigma) + 0.5*sum(((captive.lengths-pred.Lt.cap)/sigma)^2)
  return(NLL.captive)
}
### run with some dummy values to check if it works
NLL.captive(Linf=Linf, k=0.25, sigma=10, t0=t0, captive.ages=captive.ages, captive.lengths=captive.lengths,
n.captive=n.captive)
###fit data to models VBGF and optimize using MLE
###distinguish between estimated parameters and fixed variables in the mle code
vbgf.mle.cap <- mle(NLL.captive, start = list(k=0.2, sigma=2), fixed = list(Linf=Linf, t0=t0,
captive.ages=captive.ages, captive.lengths=captive.lengths, n.captive=n.captive))
summary(vbgf.mle.cap)
### result is -2 log L = 76.56483

### NEXT RUN VBGF FOR WILD-REARED HAWKSBILL DATA
### begin with minimum age estimate scenario
```

```

NLL.wild.min <- function(Linf, k, sigma, t0, wild.ages.min, wild.lengths, n.wild) {
  pred.Lt.min <- Linf*(1-exp(-k*(wild.ages.min-t0)))
  NLL.wild.min <- n.wild*log(sigma) + 0.5*sum(((wild.lengths-pred.Lt.min)/sigma)^2)
  return(NLL.wild.min)
}
NLL.wild.min(Linf=Linf, k=0.08, sigma=10, t0=t0, wild.ages.min=wild.ages.min, wild.lengths=wild.lengths,
n.wild=n.wild)
vbgf.mle.min <- mle(NLL.wild.min, start = list(k=0.23, sigma=10), fixed = list(Linf=Linf, t0=t0,
wild.ages.min=wild.ages.min, wild.lengths=wild.lengths, n.wild=n.wild))
summary(vbgf.mle.min)
### result is -2 log L = 75.13572

### next move is to run MLE for median age estimate scenario
NLL.wild.med <- function(Linf, k, sigma, t0, wild.ages.med, wild.lengths, n.wild) {
  pred.Lt.med <- Linf*(1-exp(-k*(wild.ages.med-t0)))
  NLL.wild.med <- n.wild*log(sigma) + 0.5*sum(((wild.lengths-pred.Lt.med)/sigma)^2)
  return(NLL.wild.med)
}
NLL.wild.med(Linf=Linf, k=0.08, sigma=10, t0=t0, wild.ages.med=wild.ages.med, wild.lengths=wild.lengths,
n.wild=n.wild)
vbgf.mle.med <- mle(NLL.wild.med, start = list(k=0.12, sigma=6), fixed = list(Linf=Linf, t0=t0,
wild.ages.med=wild.ages.med, wild.lengths=wild.lengths, n.wild=n.wild))
summary(vbgf.mle.med)
### result is -2 log L = 62.9941

### finally run MLE for maximum age estimate scenario
NLL.wild.max <- function(Linf, k, sigma, t0, wild.ages.max, wild.lengths, n.wild) {
  pred.Lt.max <- Linf*(1-exp(-k*(wild.ages.max-t0)))
  NLL.wild.max <- n.wild*log(sigma) + 0.5*sum(((wild.lengths-pred.Lt.max)/sigma)^2)
  return(NLL.wild.max)
}
NLL.wild.max(Linf=Linf, k=0.08, sigma=10, t0=t0, wild.ages.max=wild.ages.max, wild.lengths=wild.lengths,
n.wild=n.wild)
vbgf.mle.max <- mle(NLL.wild.max, start = list(k=0.34, sigma=6), fixed = list(Linf=Linf, t0=t0,
wild.ages.max=wild.ages.max, wild.lengths=wild.lengths, n.wild=n.wild))
summary(vbgf.mle.max)
### result is -2 log L = 63.71403
### END OF R CODE
### ENJOY

```
